# Supplementary material
Source: PubMed Central journal article supplement (PMC2755604)

<sup>1</sup> Con = Control (placebo); E = oral 17 $\beta$ -Estradiol; P = oral micronized progesterone; T = testosterone administered via subcutaneous pellets; TC, total cholesterol; LDL, low density lipoprotein; VLDL, very low density lipoprotein; HDL, high density lipoprotein. *n* = 7, 8, and 10 for Con, E+P, and E+P+T groups, respectively, for all measures.

<sup>2</sup> Values represent mean  $\pm$  standard error.

<sup>3</sup> For conversion to SI units (mmol/l), divide by 38.67 for total cholesterol, LDL+VLDL, and HDL, and by 88.57 for triglycerides.

<sup>4</sup> Letters indicate significant differences with control group (<sup>a</sup>*P* < 0.05, <sup>b</sup>*P* < 0.01) or with E+P group (<sup>c</sup>*P* < 0.05).

660

**Supplementary Table 1.** Primer / probe sets for target genes evaluated by qRT-PCR.

| <i>Gene ID</i> | <i>GenBank #</i> | <i>Species</i> | <i>ABI assay ID</i> |
|----------------|------------------|----------------|---------------------|
| <i>ACTB</i>    | DQ464112         | <i>Mf</i>      | (custom)            |
| <i>AR</i>      | NM000044         | <i>Mf</i>      | (custom)            |
| <i>ESR1</i>    | DQ469336         | <i>Mf</i>      | (custom)            |
| <i>GAPDH</i>   | DQ464111         | <i>Mf</i>      | (custom)            |
| <i>KLK3</i>    | NM001648.2       | <i>Mf</i>      | (custom)            |
| <i>MKI67</i>   | NM002417.3       | <i>Hs</i>      | Hs00606991_m1       |
| <i>PGR</i>     | NM000926         | <i>Hs</i>      | Hs00172183_m1       |
| <i>STAT5A</i>  | NM003152         | <i>Mm</i>      | Rh02844604_m1       |

*Hs*, *Homo sapiens*; *Mf*, *Macaca fascicularis* (cynomolgus macaque); *Mm*, *Macaca mullata* (rhesus macaque)

Type of file: figure

Label: 3

Filename: suppl fig1 AR.tif

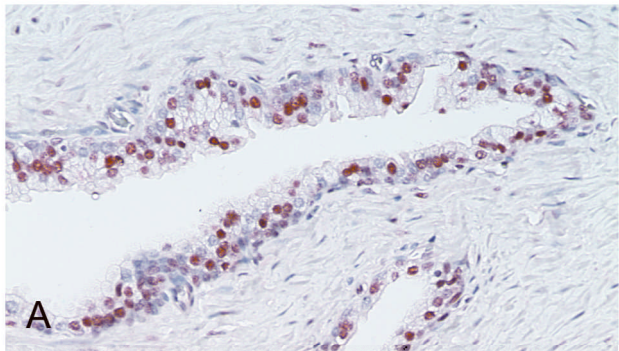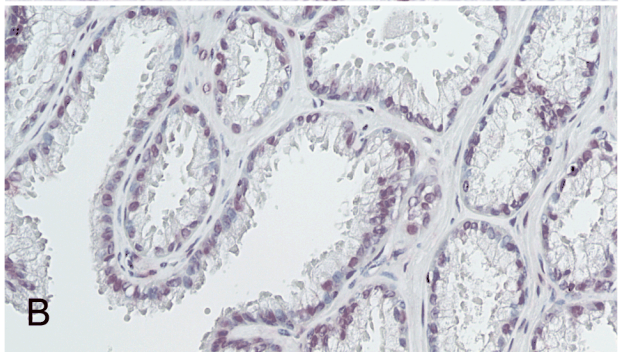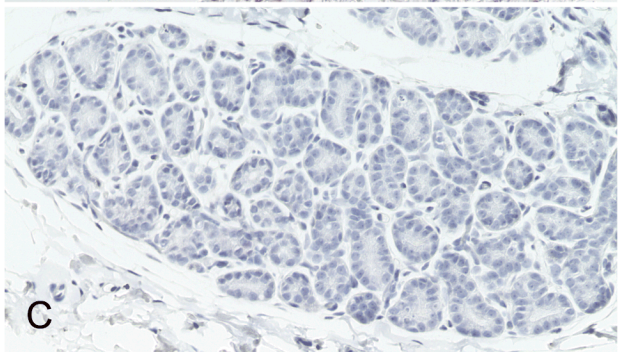

Type of file: figure

Label: 4

Filename: supp fig 2 histo mg.tif

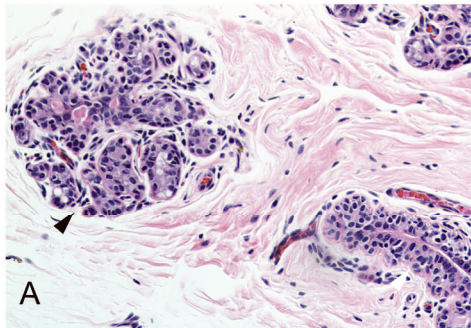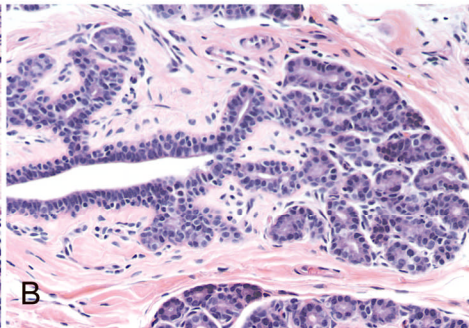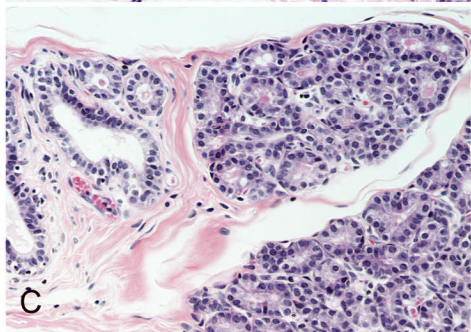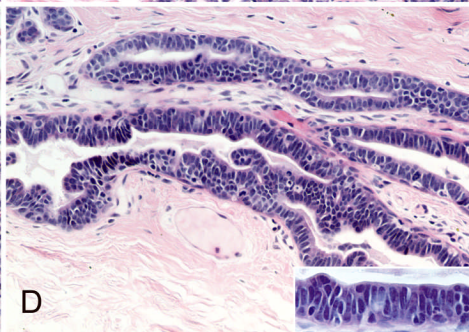

Supplement: NIHMS126556-supplement-supplement_1.pdf [file NIHMS126556-supplement-supplement_1.pdf]
